# Supplementary material for: The WGLC global gridded lightning climatology and time series, 2022 update
Source: Copernicus journal article supplement (doi:10.5194/essd-2022-88), 2022-06-21
Supplement: Supplementary file 1 [file essd-2022-88-supplement.zip]

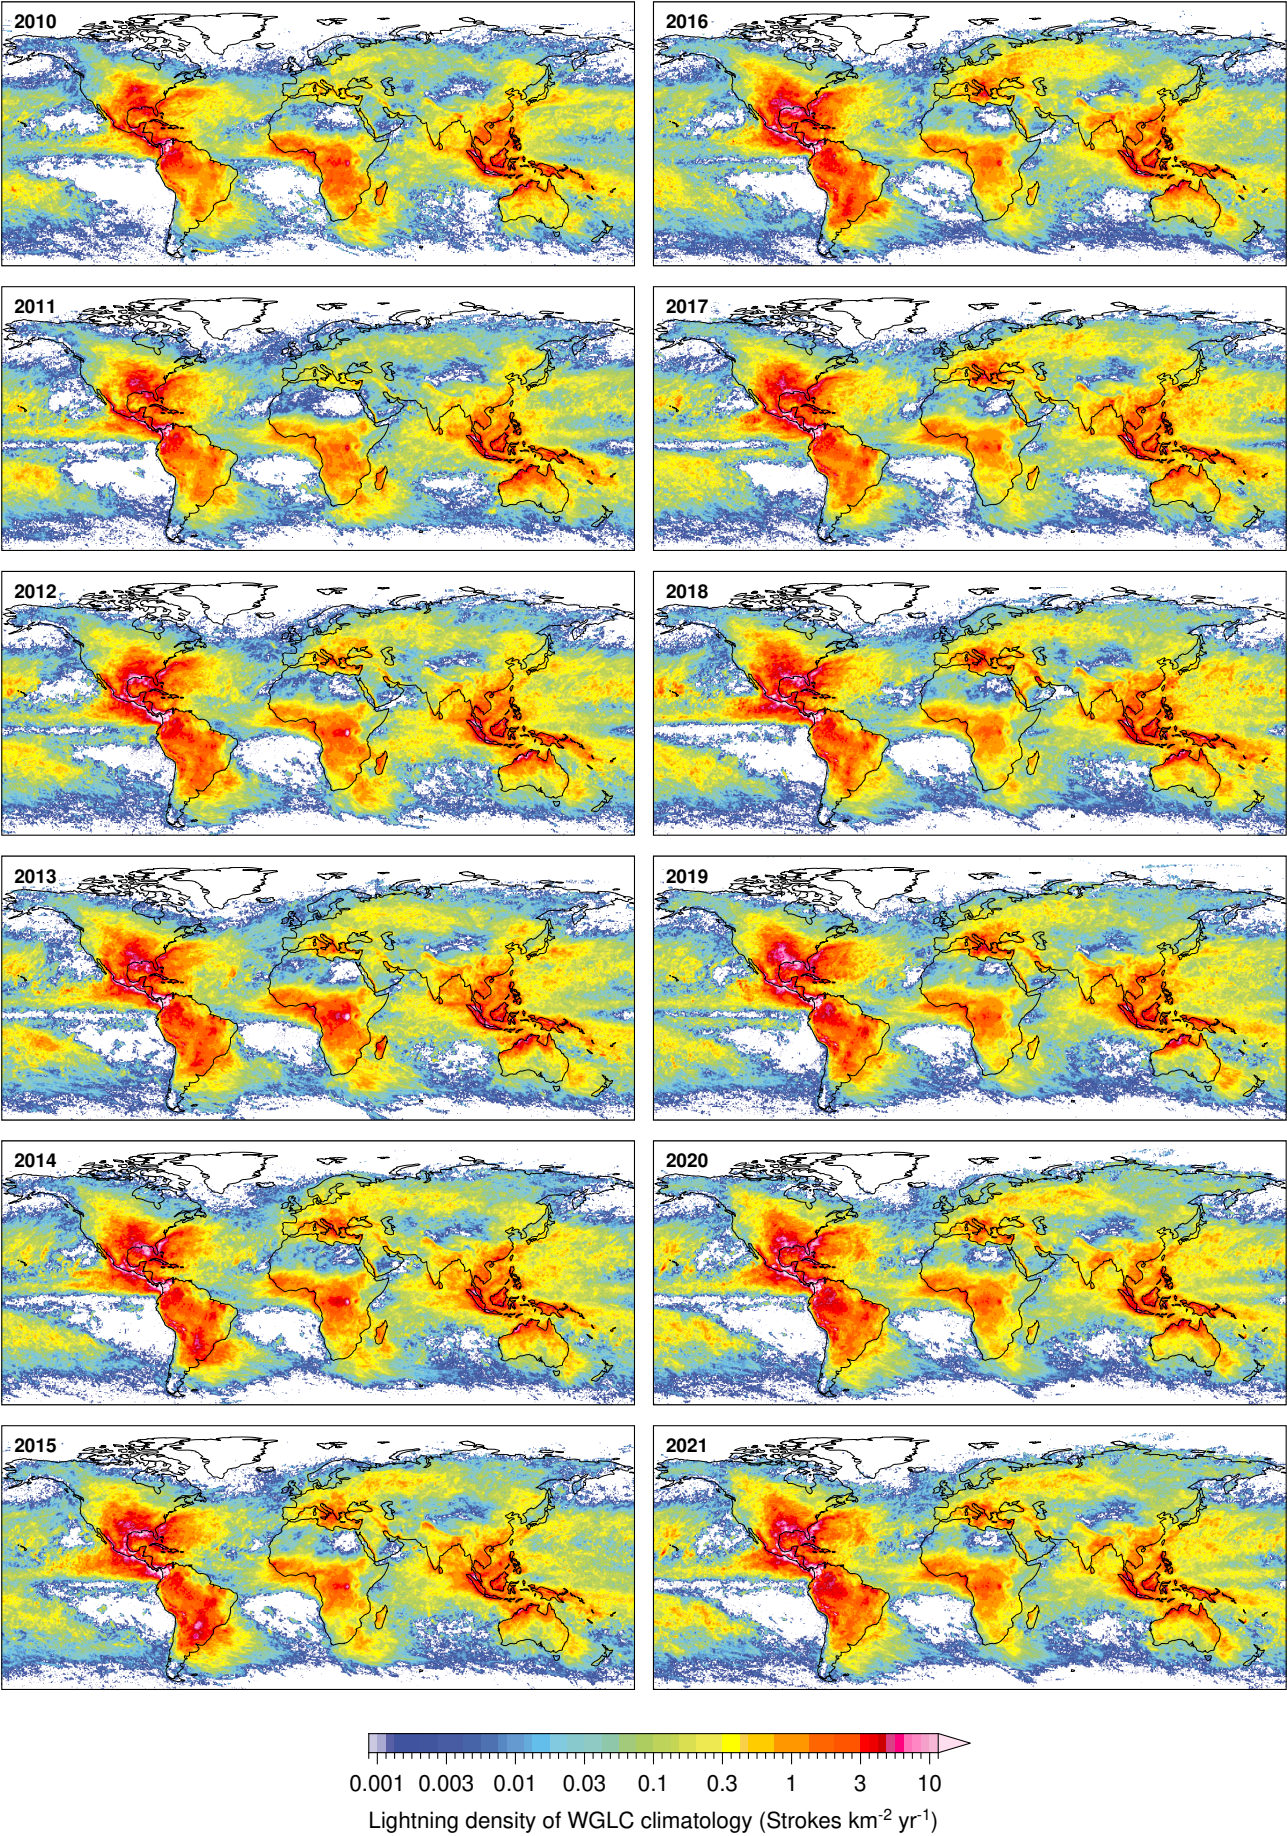

**Figure S1.** WGLC annual lightning density maps (2010-2021)



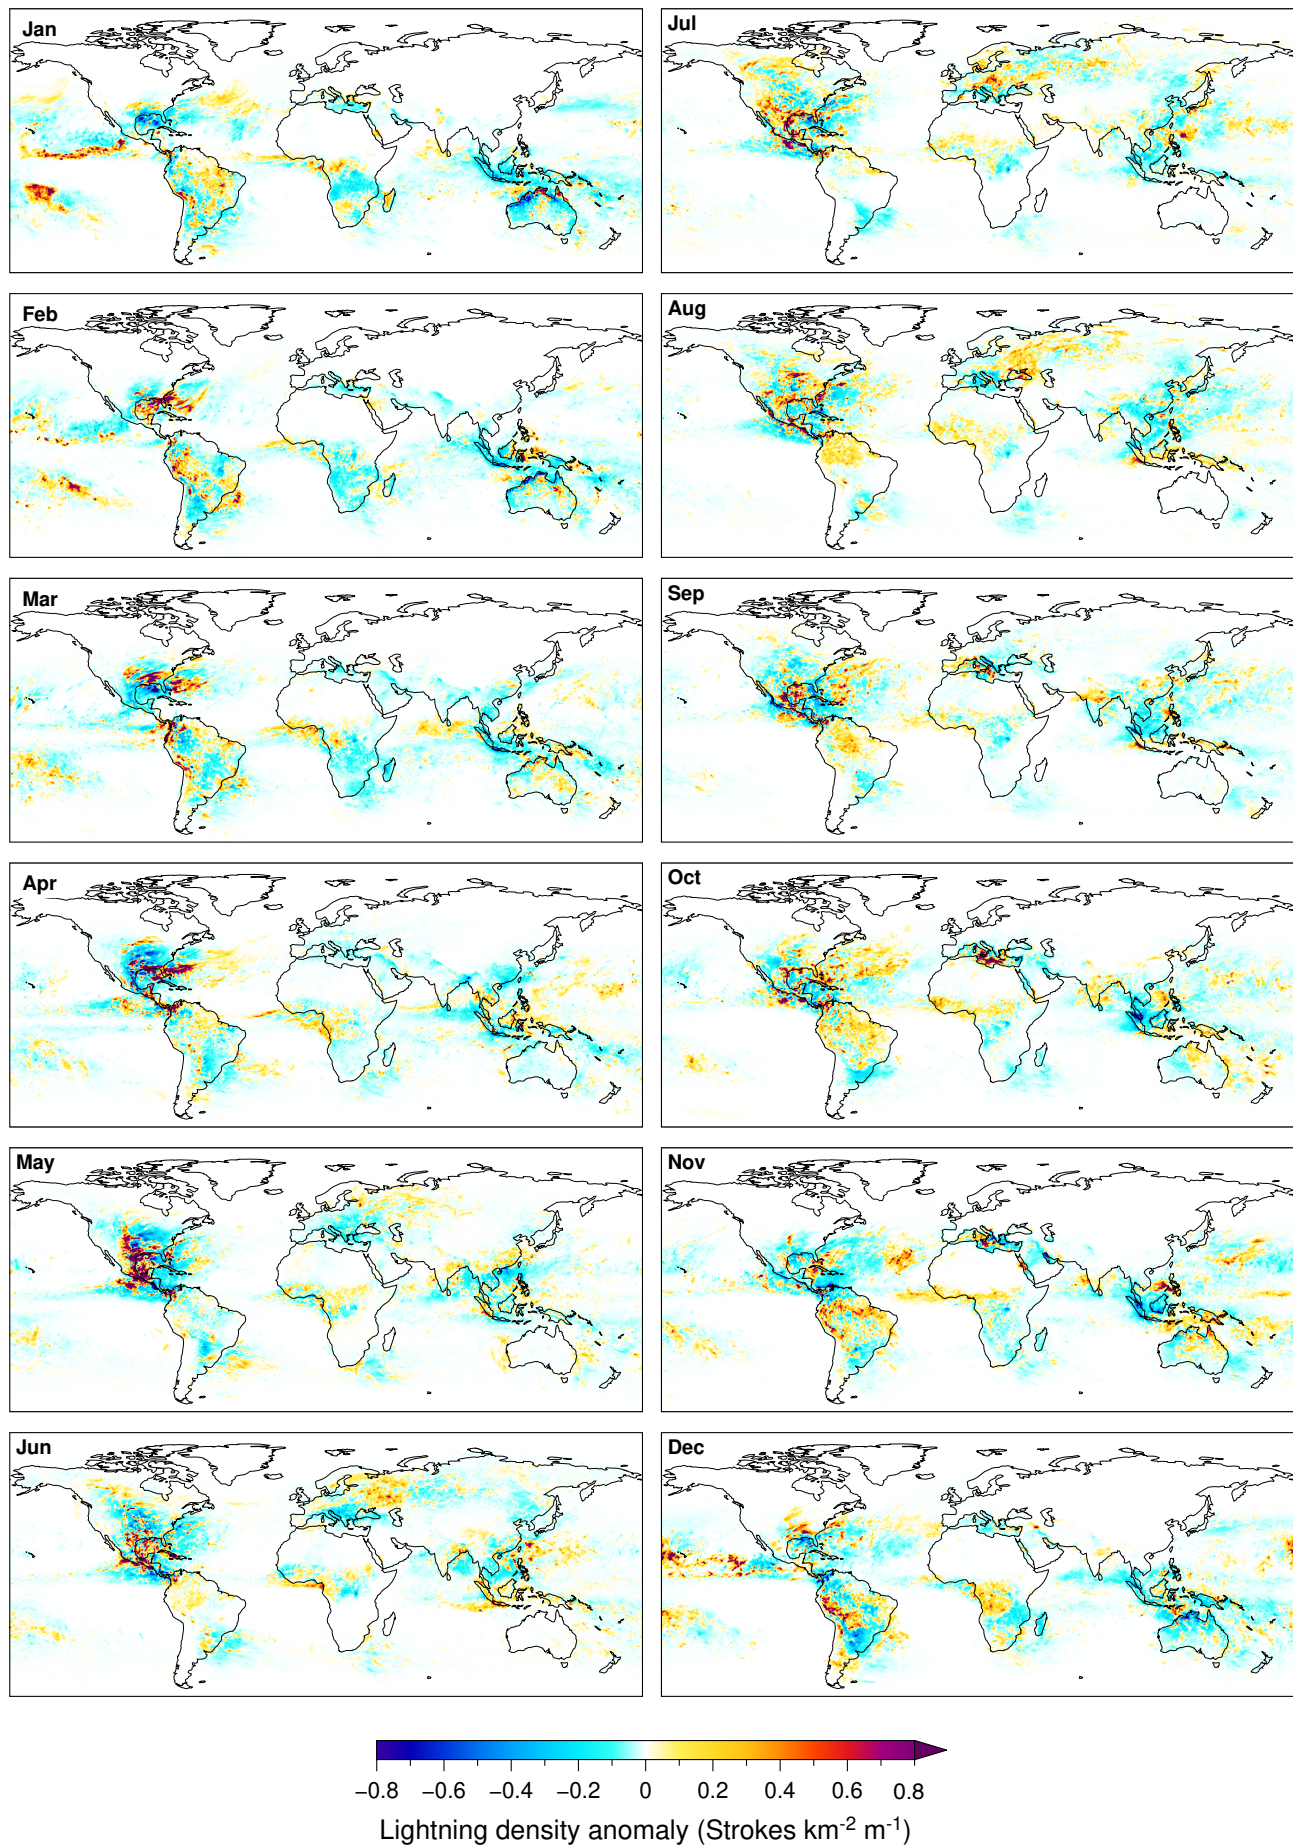

**Figure S2.** Difference between monthly lightning observed in 2021 and the 2010-2020 climatological mean.
