# Supplementary material for: The WGLC global gridded lightning climatology and time series, 2022 update
Source: Copernicus journal article supplement (doi:10.5194/essd-2022-88), 2022-06-21
Supplement: Supplementary file 2 [file essd-2022-88-supplement.zip]

# The WGLC global gridded lightning climatology and ~~timeseries~~time series, 2022 update

Jed O. Kaplan and Katie Hong-Kiu Lau

Department of Earth Sciences and Center for Climate and Carbon Neutrality, The University of Hong Kong, Pokfulam Road, Hong Kong, China

**Correspondence:** Jed O. Kaplan (jed.kaplan@hku.hk)

**Abstract.** ~~Lightning is an important atmospheric phenomenon and has wide-ranging influence on the Earth System, but few long-term observational datasets of lightning occurrence and distribution are currently freely available. Here we analyze global lightning activity over the second decade of the 21<sup>st</sup> century using a new global, high-resolution gridded timeseries and climatology of lightning stroke density based on raw data from the World-Wide Lightning Location Network (WWLLN). While the total number of strokes detected increases from 2010-2014, an adjustment for detection efficiency reduces this artificial trend. The global distribution of lightning shows the well-known pattern of greatest density over the three tropical terrestrial regions of the Americas, Africa, and the Maritime Continent, but we also noticed substantial temporal variability over the 11 years of record, with more lightning in the tropics from 2012-2015 and increasing lightning in the mid-latitudes of the Northern Hemisphere from 2016-2020. Although the total number of strokes detected globally was constant, mean stroke power decreases significantly from a peak in 2013 to the lowest levels on record in 2020. Evaluation with independent observational networks shows that while the WWLLN does not capture peak seasonal lightning densities, it does represent the majority of powerful lightning strokes. The resulting gridded lightning dataset (Kaplan and Lau, 2021b, <https://doi.org/10.5281/zenodo.4774528>) is freely available and will be useful for a range of studies in climate, earth system, and natural hazards research, including direct use as input data to models and as evaluation data for independent simulations of lightning occurrence.~~

~~Beyond well-known risks to person and property, Here we describe the 2022 update to the WGLC global gridded lightning plays an important role in the earth system. Lightning influences the chemical composition of the atmosphere, is the principle non-anthropogenic cause of wildfire ignitions (Cope and Chaloner, 1980; Daubenmire, 1968), and is an important source of high-energy radiation that affects atmospheric electricity, e.g., climatology and timeseries (Kaplan and Lau, 2021a), which extends the dataset with global lightning observations from 2021. This addition of new data means that the propagation of radio waves. Quantifying the effects of lightning on the earth system, and understanding where and how lightning presents hazards, requires an estimate of the timing, geographical distribution, and intensity of lightning strokes at continental to global scales. Large scale maps of lightning occurrence are as important as those for temperature or precipitation in some land surface (Hantson et al., 2016) and atmospheric chemistry models (Finney et al., 2016), and are valuable in their own right for understanding various meteorological phenomena such as the frequency and distribution of extreme precipitation (e.g., Williams, 2005) and for risk and hazard assessment (e.g., Ashley and Gilson, 2009; Koshak et al., 2015). Observing and~~

mapping lightning distribution at large spatial scales has thus been a priority for the community for nearly a century (Brooks, 1925; Komarova, 2016).

While scientific observations of lightning occurrence have been recorded for more than two hundred years (Krider, 2006), only recently has it become possible to create datasets with continuous global coverage. The first global datasets of lightning occurrence were derived from spaceborne remote sensing (Christian, 2003; Orville and Spencer, 1979) and remain an important tool for researchers. For nearly two decades, the only global lightning climatology freely available to researchers has been the Lightning Imaging Sensor — Optical Transient Detector (LIS/OTD) dataset. LIS/OTD found wide application in earth system science, including meteorology and climatology (e.g., Sheridan et al., 1997; Zipser et al., 2006), wildfire science (e.g., Hantson et al., 2016), atmospheric chemistry (e.g., Murray et al., 2012; Schumann and Huntrieser, 2007), and atmospheric physics (e.g., Dwyer and Uman, 2014). However, LIS/OTD has several limitations that have made it worthwhile to develop an alternative, free global gridded lightning dataset.

First, LIS/OTD covers the period 1995–2000, with additional data for the tropics (between  $\pm 38^\circ$ ) covering 1998–2010 (Cecil et al., 2014). Since this release, no update of LIS/OTD has been made. Second, while the LIS/OTD climatology is available at the relatively high spatial resolution of  $0.5^\circ$ , WGLC now contains 12 complete years of global lightning stroke observations covering 2010–2021. Slightly more lightning strokes (3%) were recorded in 2021 compared to the time-transient data are only available at a low spatial resolution ( $2.5^\circ$ ), and have temporal gaps in coverage. Furthermore, the global LIS/OTD timeseries data is not available beyond 2000. Additionally, there is a new International Space Station Lightning Imaging Sensor (ISS-LIS) lightning stroke density and energy product, but this does not cover the high latitudes, nor can the sensor, being mounted on the orbiting space station, detect lightning across the entire globe simultaneously. 2012–2020 mean of 218 million strokes  $\text{yr}^{-1}$ . In 2021, above-average lightning was recorded around the Gulf of Mexico, the Central Andes and Amazon Basin, West Africa, and over the central Mediterranean. Lower than average lightning density occurred in much of southern and East Africa, subtropical eastern South America, western Australia, and especially over the Straits of Malacca and the South China Sea. Because below-average global lightning was captured by WWLLN in 2010 and 2011 related to the build-out of the sensor network, we reprocessed the WGLC climatologies to cover the 10-year period from 2012–2021 and recommend these for applications needing climatological mean lightning fields. The updated WGLC datasets are available for download from Zenodo (Kaplan and Lau, 2022, <https://doi.org/10.5281/zenodo.6007052>).

At the same time, several very high quality lightning datasets have been produced using ground-based sensor networks used for operational lightning monitoring, e. g., by meteorological services for near real-time hazard warning. While these datasets have been invaluable for regional studies, they are either not global (e.g., Fronterhouse, 2012), or not free (Holle et al., 2018), or both (Holle et al., 2016; Orville et al., 2011).

Because LIS/OTD is neither updated nor not available at sufficient resolution for many studies, and because other datasets are not free or not global, there is a demand for an open-access, continuously updated global lightning timeseries and climatology with monthly temporal and  $0.5^\circ$  or finer spatial resolution. Over the past decade, steps have been made to develop such a dataset based on the Worldwide

Global observations of lightning are made with by the World Wide Lightning Location Network (WWLLN) ~~network of Very Low-Frequency of very low frequency~~ (VLF) radio sensors ~~-(<http://wwlln.net>; Rodger et al., 2004)~~. In 2021, we published gridded fields of lightning density and power based on WWLLN observations for use in Earth System Modeling and other applications that covered the period 2010-2020 (Kaplan and Lau, 2021a). This short communication is to document an update to the WGLC gridded products that now includes data from 2021. We also describe the major features of lightning observed in 2021 compared to previous years.

Based on the observation that lightning strokes emit characteristic VLF radio energy in the 1-24 kHz range, and that the location of strokes could be established through triangulation (Dowden et al., 2002; Rodger et al., 2004), the WWLLN was established in 2003 and produced its first set of global observations in August 2004. The WWLLN network has grown steadily over subsequent years and been improved with postprocessing to correct for timing and location inaccuracies, and provide estimates of relative detection efficiency and energy per stroke. Currently, the WWLLN has over 70 participating detector stations that monitor VLF radio waves in real-time. The initial specification of the network was to provide global real-time locations of lightning discharges with more than 50% flash detection efficiency (Rodger et al., 2004) and global mean location accuracy of 3.4 km (Rodger et al., 2005).

Since its inception, the WWLLN has been used in more than 100 publications including local, regional, and global studies on atmospheric electricity (e.g., Ammar and Ghalila, 2020), climate phenomena including precipitation and tropical cyclones (e.g., Lin and Chou, 2020), and to develop regional climatologies (e.g., Bovalo et al., 2012; Soula et al., 2016). A complete list of published studies using WWLLN is cataloged at <http://wwlln.net/publications>. WWLLN has been extensively evaluated against independent observations of lightning occurrence and stroke energy at regional and global scale, including studies assessing the network's detection efficiency (Abarea et al., 2010; Bürgesser, 2017; Hutchins et al., 2012a), precision in geolocation (Rodger et al., 2005), and accuracy of the calculated stroke energy (Rodger et al., 2006).

Virts et al. (2013a) presented the first global lightning climatology based on WWLLN data covering the period 2005-2012 with 0.25° spatial and hourly temporal resolution. In this study, the gridded WWLLN climatology was compared with LIS/OTD and also showed the added value of observing the diurnal cycle of lightning by having a dataset with hourly resolution (Virts et al., 2013a). In the intervening years, WWLLN has continued to collect data and increased the quality of the retrievals through a build-out of the sensor network. Given these improvements, continued interest in an open-access global gridded lightning dataset, and questions about the relationship between ongoing climate change and lightning occurrence, synthesis of the WWLLN data are due for an update.

Here we present a new analysis of all of the WWLLN data collected to-date, the development of a multi-resolution gridded climatology and timeseries, and evaluation of the resulting fields with independent observations from surface and spaceborne sensors. We demonstrate that in terms of total number of strokes detected the WWLLN network stabilized around 2014, but that with corrections for relative detection efficiency the dataset can be used back to 2010. We discuss the climatology of lightning over the second decade of the 21<sup>st</sup> century and interannual variability in lightning distribution and stroke power. The

global-gridded datasets resulting from this study form the WWLLN Global Lightning Climatology (WGLC). The WGLC is freely available for download at 0.5° and 5 arc-minute spatial and monthly temporal resolution, and will be updated annually in the first quarter of every year.

## 2 Methods

### 2.1 Description of the WWLLN raw data

The World Wide Lightning Location Network (<http://wwlln.net>) is a global lightning detection network developed through international collaboration, supported by researchers around the world who host the sensors, and coordinated at the University of Washington. WWLLN is currently based on an array of 70 very-low-frequency (VLF) radio sensors with at least two sensors on every continent with additional sensors on several oceanic islands (Fig. S1).

WWLLN data consist of georeferenced timestamps representing the time and location at which a lightning stroke was detected. Two types of WWLLN data are distributed by the network. Raw data (“A” data) are timestamped lightning-stroke locations—these are defined by the WWLLN operators as events with residuals less than 30  $\mu$ s and where more than five WWLLN stations participated in providing the location—that may be retrieved in near real-time by network subscribers. Postprocessed “AE” data are almost the same as the “A” data but are reprocessed to include a determination of the radiated VLF energy in The method for gridding the raw lightning stroke observations made by the WWLLN are described in detail in Kaplan and Lau (2021a). We made no changes in this methodology in preparing the data update. Briefly, raw lightning observations are recorded with a latitude, longitude, and timestamp. Geographic data are nominally given with a precision of  $10^{-4}$  decimal degrees, but the actual location accuracy of the 7–18 kHz band and ancillary information, including the RMS stroke energy and an uncertainty in the energy estimate. WWLLN AE data also may have a slight differences with A data in the least significant digits of the geolocation, because additional station retrievals may be used in improving the location accuracy. Postprocessed WWLLN AE data are available some days after detection.

For both WWLLN A and AE data, stroke count data are provided as ASCII text format files and include a date and timestamp to the nearest microsecond, latitude and longitude in decimal degrees (WGS84), an estimate of the geolocation uncertainty, and the number of WWLLN stations that were used to determine the stroke location. The postprocessed AE files further contain additional data columns containing RMS energy (J) and energy uncertainty (energy error of the fit in J). Raw WWLLN data are proprietary and cost USD 600 per year of data at the WWLLN has been estimated at ca. 3.4 km (Rodger et al., 2005). The time of this writing. After purchasing the data we downloaded both A and AE files from servers hosted at the University of Washington.

In addition to the raw stroke counts described above, WWLLN provides gridded maps of Relative Detection Efficiency to accompany the AE data. The relative detection efficiency maps “account for changes in the ionosphere and the operational status of stations and thus allow for adjustment of the measured lightning density as though WWLLN had uniform global detection efficiency” (Solorzano et al., 2016). These detection efficiency maps (hereafter deMap) are free to download (<http://wwlln.net/deM>)

The deMap data are provided as global raster files with 1° spatial and hourly temporal resolution. The theory behind, and methodology for, generating the DE maps is described in detail by Hutchins et al. (2012a).

Flowchart of the WGLC gridding and detection efficiency adjustment process.

### 2.0.1 Gridding and adjustment for detection efficiency

Our methodology for developing the WGLC gridded lightning datasets includes several steps for quality assurance and adjustment for relative detection efficiency. The workflow is shown in Figure 1. In summary, raw WWLLN lightning stroke count data are 1) gridded to the target spatial resolution with hourly temporal resolution; 2) cells with fewer than 2 strokes per hour are removed as they are considered to be noise (B. Holzworth, personal communication, May 2019); 3) filtered stroke count data is divided by grid area to calculate the lightning density in each grid; 4) hourly 1° deMaps are remapped with bilinear interpolation to the target grid resolution, and the hourly stroke density is divided by detection efficiency to produce an adjusted lightning density field. With perfect detection efficiency, the adjusted lightning density remains the same as the original, while when detection efficiency < 1, the resulting stroke density is increased by the reciprocal of the efficiency estimate. every lightning stroke is recorded to the nearest microsecond. Individual lightning stroke observations are summed on a geographic grid at the desired spatial resolution (0.5 degree or 5 arc-minute), corrected for WWLLN detection efficiency using hourly gridded fields provided by the network, and aggregated into daily, monthly, and annual means and monthly rasters.

To evaluate the evolution of the WWLLN over time, we produced a global 0.5° gridded timeseries based on the “A” data from the beginning of the first full year of WWLLN observations in 2005 to 2018. Because the relative detection efficiency fields and “AE” data are only available starting in Because below-average global lightning was captured by WWLLN in 2010, the final version of our gridded lightning density dataset, i.e., the WGLC, covers the period 2010-2020. Below we show a timeseries of global lightning totals using the “A” data for the period 2005-2018 to illustrate the differences between the “A” and “AE” data in the overlapping interval, but consider the postprocessed “AE” to be higher quality and therefore distribute datasets only based on “AE” stroke counts. We produced global gridded maps of lightning stroke density at daily and monthly temporal and two spatial resolutions (2011 related to the build-out of the sensor network (Fig. 1), we reprocessed the climatological mean fields for the WGLC to cover the 10-year period from 2012-2021. The WGLC is distributed as monthly timeseries at 0.5 degree and 5 arc-minute ). The gridded maps are distributed as both daily and monthly timeseries for the period 2010-2020 and as a climatological mean over that 11-year period.

The WWLLN is capable of not only detecting lightning stroke occurrence, but also making an estimate of the energy released by each stroke (for a detailed discussion see, Holzworth et al., 2019). We used the individual energy-per-stroke estimate reported as part of the WWLLN-AE data to produce gridded maps of stroke power. Following Hutchins et al. (Hutchins et al., 2012a) we convert stroke energy (J) to power (MW) using

$$P_{WWLLN} = 1e - 6 \frac{E}{1676 \cdot 0.00133}$$

where  $E$  is the stroke energy (J) reported by WWLLN and 0.00133 (1.3 ms) is the triggering window for the time-integrated electric field of the WWLLN detector. The resulting gridded fields of stroke power are not subject to any adjustment for detection efficiency or filtering of single strokes so that we could compare them directly with independent observations of stroke power. In the WGLC gridded datasets, we provide the mean, median, and standard deviation of stroke power for each gridecell at monthly resolution, as a daily timeseries at 0.5 degree resolution, and as climatological monthly means at 0.5 degree and 5 arc-minute. The data are distributed in CF-compliant netCDF (version 4) files.

## 2.1 Comparison with independent observations of lightning occurrence [Results](#)

To place the WGLC in the context of other widely used lightning data, we compared our gridded fields with two datasets based on ground-based detection networks and one from spaceborne remote sensing. We used raw stroke count data from the Alaska Lightning Detection Network (ALDN; Fronterhouse, 2012) for the years 2012-2019 and a gridded product based on the U.S. National Lightning Detection Network (NLDN; Orville, 1991) for 2010-2014. We gridded the WWLLN data on to a 10 km Lambert Azimuthal Equal Area grid for comparison with the ALDN and on to a ca. 12 km Lambert Conformal Conic projection for comparison with NLDN. Workflows for the process of gridding the WWLLN data for these comparisons are shown in Figures. S2-

## 2.2 Trends in global lightning

Global lightning increased slightly between 2020 and 2021 from 216 to 225 million strokes, and S3. 2021 was among the years with the greatest amount of lightning observed over the past decade (Fig. 1), although not as high as the 230 million strokes recorded in 2013. Between 2012 and 2021, no obvious trend in global lightning strokes is visible in the timeseries that has been adjusted for detection efficiency. Interannual variability ranged from 204 to 230 million strokes ( $1\sigma \pm 8.3$  million) over this period. The adjustment for detection efficiency has little effect on lightning observed in 2021, increasing the total by 2.75 million strokes or 1.2%.

### 2.2.1 Alaska Lightning Detection Network (ALDN) Data

Comparisons with regional ground-based detection networks can help understanding of the capabilities of WWLLN, as regional detection networks have higher precision and may detect more strokes than WWLLN, at least locally. The Alaska Lightning Detection Network was originally developed in the 1970's and has been upgraded multiple times over the intervening years. Studies have shown that the detection efficiency of the ALDN increased from 40-80% to 80-90% after sensors were upgraded to Vaisala Impact ES sensors in 2012 (Bieniek et al., 2020; Farukh et al., 2011). A further upgrade to a completely new set of time-of-arrival sensors (operated by TOA Systems, Inc.) was made after 2012 (Bieniek et al., 2020).

ALDN lightning data is distributed by The Alaska Interagency Coordination Center (AICC) and is one of the only completely unrestricted open access ground-based lightning datasets currently available. ALDN historical data are free to download and contain timestamped, georeferenced reports of cloud-to-cloud and cloud-to-ground lightning stroke count over the central

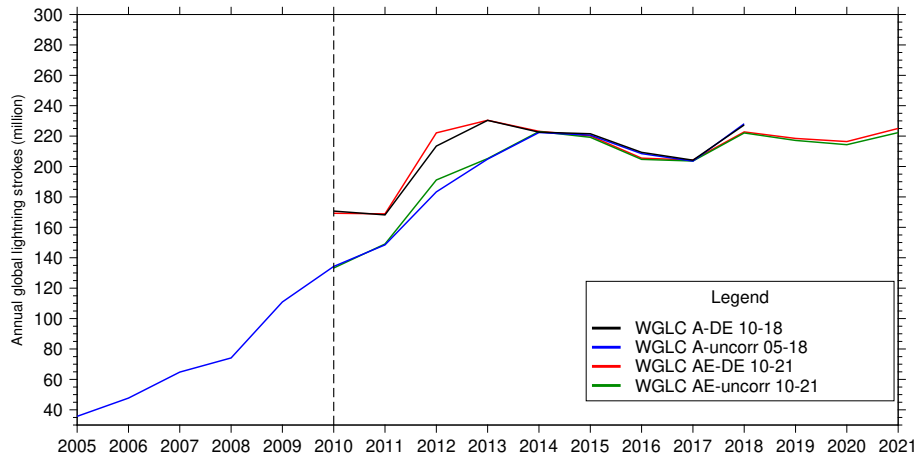

**Figure 1.** Total global lightning strokes from 2005 to 2021. WWLLN produces two sets of raw lightning stroke data: A (A-row) and AE (AE-row). The A-DE and AE-DE curves are adjusted for the WWLLN reported detection efficiency. Detection efficiency and AE data were produced starting in 2010. WWLLN “A” data (A-row and A-DE) are shown for illustrative purposes and only up to 2018.

part of Alaska. Far southwestern Alaska, the Aleutian Islands, and the southeastern “Alaska Panhandle” are not covered by the  
 190 ALDN network. We downloaded daily lightning stroke counts from the ALDN historical lightning dataset (Alaska Interagency Coordination  
 from the beginning of the period for which the TOA-based sensor network was operational (2012–2019). We projected the  
 ALDN stroke counts to a Lambert Azimuthal Equal-Area Projection with projection center 50°N/154°W and gridded to these at  
 10 km resolution on a raster with corner coordinates 72°N/170°W 51°N/129°W (NW–SE). We gridded the WWLLN lightning  
 counts with the same map projection, boundary and resolution. To process the WWLLN detection efficiency adjustment,  
 195 we remapped the hourly deMaps with bilinear interpolation to the same 10 km grid for Alaska. Because the ALDN was  
 not designed to detect lightning strokes over the oceans, we restricted our comparison to land areas only by using a 10 km  
 land mask based on the NaturalEarth coastline dataset (<https://www.naturalearthdata.com>). Additionally because the ALDN  
 provides a measurement of stroke energy in terms of peak current (amperes), we compared these estimates with stroke energy  
 estimates from WWLLN. Following Hutchins et al. (Hutchins et al., 2012b), we converted energy estimates from both datasets  
 200 into common units of power (megawatts; MW) and gridded both data sources on to the Alaska equal-area grid described above.  
 To convert ALDN peak current in kA to MW, we used the relationship:-

$$P_{ALDN} = 1e - 6 \cdot 1676 |I_{peak}|^{1.62}$$

where  $I_{peak}$  is the peak current provided by ALDN (Hutchins et al., 2012b, eqn. ??). For WWLLN, we converted stroke energy  
 to MW as described in eqn. ?? above.

205 With the stroke power in the same units, we segregated the WWLLN and ALDN datasets into overlapping and non-overlapping  
 categories based on geolocation and timestamp. Strokes detected in the same gridcell and in the same hour were considered  
 to be overlapping. Power of every captured strokes has been considered. With this information, we determined the tendency

for lightning detected by ALDN but not present in the WWLLN data to be of relatively low energy, i. e., to see if WWLLN captures the occurrence of the majority of powerful lightning strokes, even if it cannot detect all strokes.

We further evaluated the WGLC with observation of lightning over the conterminous United States from the National Lightning Detection Network (NLDN). While the NLDN raw data are not generally freely available, the Community Modelling and Analysis System (CMAS) has released a gridded lightning density timeseries (2002-2014) based on the NLDN (Community Modeling and Analysis System, 2014). The NLDN detects lightning strokes using a network of over 100 ground-based electromagnetic sensors constructed and operated by Vaisala (Orville, 1994). The reported cloud-to-ground stroke detection efficiency of the NLDN is greater than 95% (Cummins et al., 2006). The CMAS gridded NLDN dataset contains monthly mean cloud-to-ground flash rates ( $\text{km}^2$  per day) for the conterminous United States on the 12 km CMAQ Lambert Conformal Conic grid (first standard parallel:  $33^\circ\text{N}$ ; second standard parallel:  $45^\circ\text{N}$ ; projection center:  $40^\circ\text{N}$ ,  $97^\circ\text{W}$ ). For comparison with WGLC, we projected and gridded the WWLLN AE lightning stroke count data from 2010-2014 on the CMAQ grid described above. We applied the WWLLN detection efficiency adjustment by remapping the deMaps on to the same grid. Similarly to our processing of the ALDN data, we restricted the comparison between WWLLN and NLDN to land areas by masking with a coastline polygon. We compared WWLLN monthly mean lightning stroke density between the two datasets.

### 2.2.1 ~~Spaceborne Remote Sensing (LIS/OTD) Data~~

### 3 Results

The spatial patterns of the WWLLN data and selection of new climatological mean total annual lightning over the ten-year period for 2012-2021 differ little from our previous dataset (Fig. 2; Kaplan and Lau, 2021a). Lightning is observed over all of Earth's land surface with the exception of the Canadian high Arctic, Greenland, and Antarctica. Lightning is also ubiquitous



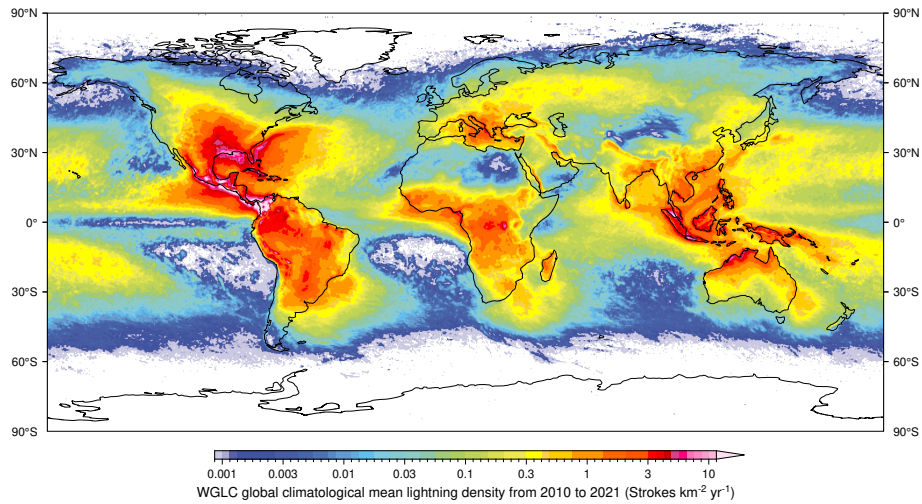

**Figure 2.** Total global Climatological mean annual lightning strokes from 2005 to 2020. WWLLN produces two sets of raw lightning discharge data: A stroke density (A-raw 2012-2021) and AE (AE-raw). The A-DE and AE-DE curves are adjusted for the WWLLN-reported detection efficiency. Detection efficiency and AE data were produced starting in 2010. WWLLN “A” data (A-raw and A-DE) are shown for illustrative purposes and only up to 2018.

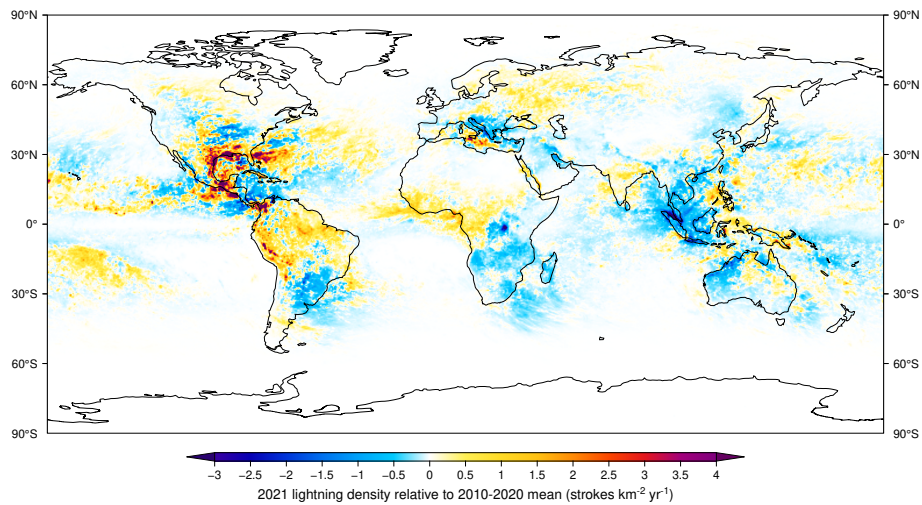

**Figure 3.** Difference between lightning observed in 2021 and the 2010-2020 climatological mean.

over the oceans, except in the WGLC. The WWLLN was established in 2003 and released its first global dataset in August, 2004. The first complete year of WWLLN data is 2005. Figure 2 shows the time trend of global total lightning strokes observed by WWLLN from 2005-2020. During the first 10 years, the global number of lightning strokes captured by WWLLN increases linearly from 35.7 million in 2005 to ca. 222 million in 2014, and remains stable in the range of 205 to 230 million strokes per year thereafter. The linear increase in stroke counts between 2005-Arctic, northernmost Pacific, Southern Ocean, and 2012 was

caused by the build-out of the network with progressively more stations located over more continents and oceanic regions over time, which increased the network's overall detection efficiency (Holzworth et al., 2019).

245 The WWLLN AE data, stroke energy estimates, and detection efficiency fields were produced starting in 2010. The number of global lightning strokes in the AE data (Fig. 2, green line) is very similar to the A data (Fig. 2, blue line) with the AE data having slightly higher stroke counts in 2012 and the A data being slightly higher in 2016 and 2018. The postprocessing of the A data to AE data has only a very limited effect on the total number of lightning strokes detected by the WWLLN.

Effects of the WGLC detection efficiency adjustment. The monthly zonal mean difference between the detection efficiency-adjusted WGLC with unadjusted data are shown for 2010-2020. The WWLLN reported detection efficiency adjustment has its greatest effect in the tropics and Southern Hemisphere subtropics before 2014. As described above, we used the gridded, hourly WWLLN detection efficiency fields to produce an adjustment to the gridded WGLC to account for the reported detection efficiency. Using the WWLLN AE data and applying the detection efficiency adjustment, the WGLC annual stroke sum increases by about 11% from 2010-2013 and by 2014 converges with the unadjusted data, suggesting that the WWLLN detection efficiency reaches its maximum by this time. The effect of the detection efficiency adjustment is shown in Figure 3. Most of the difference between the raw and adjusted data takes place during peak thunderstorm season in the subtropical gyres of the Southern Hemisphere. Large amounts of lightning are observed in the tropics, especially over the Southern Hemisphere (30°S-15°N). In some periods, the difference between the original and adjusted WGLC data in stroke density exceeds  $0.035 \text{ strokes km}^{-2} \text{ mon}^{-1}$ .

260 Climatological mean annual lightning stroke density (2010-2020).

## 2.2 Spatial and temporal distribution of WGLC lightning density

The WGLC global climatological mean (2010-2020) lightning density is shown in Figure 4. The latitudinal distribution of lightning strokes is apparent in the global map, with greatest density of lightning in the tropics, on, and adjacent to, the landmasses. Hotspots of lightning are apparent in Central America and and subtropics, particularly over the Americas and in parts of Island Southeast Asia. The greatest lightning densities are in northwestern South America, in the Mississippi Delta and Central America, and over the northern Gulf of Mexico, off the Atlantic coast of the southeastern United States, in the easternmost Congo Basin just to the west of Lake Kivu, and over the Straits of Malacca, the Island of Java, and in northwestern Australia. Consistent with previous observations, the greatest recorded climatological mean stroke density of  $36 \text{ strokes km}^{-2} \text{ yr}^{-1}$  is located around Lake Maracaibo in northern Venezuela (Bürgesser et al., 2012). In contrast, extremely little to no lightning at all is observed in the polar regions, on the western sides of the subtropical gyres of the South Atlantic, southeast Pacific, and Indian Oceans, along the equator in the eastern Pacific, and in the hyperarid desert regions of the eastern Sahara, Central Asia, and southern Patagonia. In much of the temperate regions of the world, intermediate lightning densities are visible ( $1\text{-}3 \text{ strokes km}^{-2} \text{ yr}^{-1}$ ), with well-known regions of high lightning occurrence in the southern Great Plains of North America, along the southeast coast of China, and in the Adriatic Sea and Eastern Mediterranean. Lightning is apparent throughout the boreal forest regions of North America and Eurasia, although with low densities ( $<0.1 \text{ strokes km}^{-2} \text{ yr}^{-1}$ ), particularly in Alaska and Eastern Siberia. The geographical distribution of stroke density is in generally consistent with

the global WWLLN lightning distribution maps presented by Virts et al. (2013a) (Fig. 2b), which were based over a shorter period, and adjacent lands.

High-resolution (5 arc-minute) climatological mean annual lightning stroke density over northwestern South America and Central America. High-resolution (5 arc-minute) climatological mean annual lightning stroke density over equatorial southeast Asia and the western Pacific. The 5 arc-minute (ca. 10 km) version of the WGLC allows us to have a clearer picture of the relationship between lightning strokes and topography and land-ocean contrasts. Figure ?? shows the climatological mean lightning over northwestern South America and Central America. The greatest densities of lightning, frequently over 10 strokes  $\text{km}^{-2} \text{yr}^{-1}$ , are found in the coastal ocean and at lower elevations on land; higher terrain in the Andes and along the mountain spine of Central America have 1-2 orders of magnitude lower density of lightning strokes. In addition to those regions mentioned above, a hotspot for lightning is found in the Chocó region of western Colombia; a region that is known for the perennial formation of mesoscale convective complexes that lead to some of the greatest annual rainfall recorded on earth (Poveda and Mesa, 2000). In Figure ?? we show the climatological mean lightning at 5 arc-minute resolution for equatorial southeast Asia and

Despite the overall similarity in the spatial pattern of climatological mean lightning, there were some differences in 2021 compared to mean over preceding years (Figs. 3, S1). In 2021, more lightning than average was recorded in the Gulf of Mexico and surrounding lands, in the western Pacific. In this map the greatest density of lightning is apparent in the tropical Pacific north and south of the Equator, off the Atlantic coast of the southeastern United States, in southern Mexico and neighboring Central America, in the northern and central part of the Southern America, in the central Mediterranean Sea, and over West Africa, much of India, and the easternmost South China Sea. In contrast, less lightning was recorded in mainland and island Southeast Asia, particularly over the Straits of Malacca and in adjacent parts of Peninsular Malaysia, on the western part of the Island of Java, central Sulawesi, on the northern and southern slopes of the New Guinea ranges, on the Melanesian islands of the Bismarck Archipelago and Bougainville, and in coastal northwestern Australia. The land-sea contrast is apparent throughout this region, with lightning density alternately greater over nearshore land (Australia, Java) or over the adjacent sea (Sumatra, Malacca). Similarly to South and Central America, the core of the major mountain ranges on New Guinea, Sulawesi, Borneo, and Sumatra show less lightning than surrounding areas, indicative of how deep convection is inhibited over the highest terrain (Houze et al., 2015; Perry et al., 2014).

Climatological monthly mean global lightning stroke density (2010-2020). Figure ?? shows the climatological mean seasonal cycle of lightning. Inspection of these maps shows the distinct seasonal pattern of lightning density over both land and the oceans following the summer hemisphere and the migration of the intertropical convergence zone (ITCZ). Few parts of the world are subject to thunderstorms perennially. Peak lightning density is in the tropics and clearly follows the seasonal migration of the ITCZ with generally higher density over land than the oceans, consistent with similar observations of deep convection (Houze et al., 2015). In the extratropical Northern Hemisphere, almost no lightning is observed on land during the winter months, reaches a peak in central North America in May, in Alaska in June, and in much of Boreal North America and Eurasia in July. In the Mediterranean lightning over water is common during the winter months, while in the summer the locus of lightning shifts to the land. In the Southern Hemisphere extratropics, lightning is most common in the summer months of December-February.

In a few regions of the world, moderately high lightning density ( $> 0.1$  strokes  $\text{km}^{-2} \text{mon}^{-1}$ ) occurs year-round (Fig. S4). These locations include subtropical eastern South America (Brazil-Paraguay-Argentina southwest of Iguazú Falls), northeasternmost South America (Colombia-Venezuela), the northern Gulf of Mexico and adjacent Mississippi Delta, the westernmost North Atlantic ( $25^{\circ}$ - $38^{\circ}\text{N}$ ), the central Congo Basin, the Straits of Malacca and adjacent Malaysia and Sumatra, northeastern Borneo, and northern New Guinea and the Bismarek Archipelago.

Zonal-mean lightning stroke density anomalies (monthly value relative to the climatological monthly mean from 2010-2020). Because the WGLC consists of a timeseries of monthly lightning density from 2010-2020, we can also examine the interannual variability in lightning over time. Figure ?? shows the zonal pattern of monthly lightning density subtracted by the climatological mean, i.e., the deseasonalized anomaly, for 2010-2020. While some of the patterns may be related to the increase in detection efficiency of the WWLLN over time (see Fig. 2), several patterns are clearly apparent in this analysis. These include increasing lightning in the mid- and high latitudes of the Northern Hemisphere, and periods of enhanced lightning around the equator between 2012-2014, Java, and 2018-2019, and in the Southern Hemisphere extratropics between 2012 the South China Sea. Less lightning than average is also apparent in Western Australia, west of Lake Victoria in East Africa and generally across eastern and southern Africa, in southeastern South America, and 2016. There is clearly less lightning than the climatological mean in the Southern Hemisphere extratropics from 2017-2020. Analysis of annual lightning maps (Fig. S5) shows greater than average lightning density in South America and the southwest Atlantic Ocean from 2014 to 2016. In western and central Africa, lightning density was particularly high in 2013, while in the Mississippi Delta and southern Great Plains, lightning density was greatest in 2019. over the Caribbean Sea (Figs. 3). On a seasonal basis, more lightning strokes were detected over the United States and Central America during Northern Hemisphere summer and autumn (from May to October) and in the western part of the Amazon Basin during Southern Hemisphere summer (from November to February). In contrast, fewer lightning strokes were observed in the Strait of Malacca and northwest Australia from October to March (Fig. S2).

## 2.2 Trends in stroke power

Timeseries of global median lightning stroke power.

## 335 2.3 **Lightning stroke power**

As noted in earlier studies (Holzworth et al., 2019; Iwasaki, 2015), the global distribution of lightning stroke power bears little resemblance to stroke density. In Figure ??, we show the annual climatological mean (2010-2020) median power-per-stroke. Regions with greatest stroke power are concentrated over the oceans, in particular over the northeast Atlantic, Norwegian Sea, and northern North Sea, in the Gulf of Alaska, and in the Southern Ocean between  $45^{\circ}$

340 In 2021, stroke power increased slightly in comparison with previous years. Figure 4 shows monthly total solar irradiance, median lightning stroke power, and  $60^{\circ}\text{S}$ , especially in the Pacific. Areas of high lightning density, e.g., in central North America, and across the tropics, have relatively low per-stroke power. Comparison of median stroke power with the mean (Fig. S6) shows that a few additional regions are characterized by rare, very powerful strokes, including the western margin of the tropical Indian Ocean and Eastern Siberia. The monthly timeseries of global stroke power is shown in Figure ??.

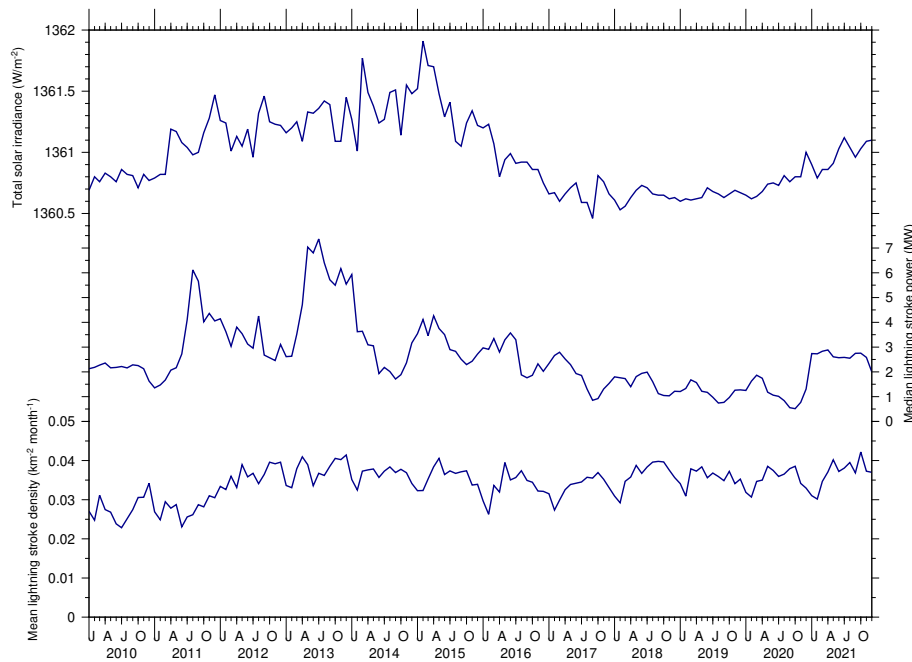

**Figure 4.** Climatological annual mean Timeseries of the total solar irradiance (TSI; LASP, 2021), monthly median of WGLC global lightning power-per-stroke stroke power, and monthly mean global lightning density.

stroke density from 2010 to 2021. Median stroke power shows substantial seasonal and interannual variability as previously reported. Generally the season with greatest per-stroke energy is in Northern Hemisphere winter, although the seasonal cycle does not appear to be entirely stationary. Interannual variability shows a remarkable maximum during between March and December 2013, with median stroke power nearly three times the decadal mean. Following this peak there is a near continuous decrease in median stroke power to the past decade, with a gradual decrease from a peak in March 2013 until the end of 2020.

Timeseries of monthly mean lightning density over Alaska. Alaska Lightning Detection Network (black line: ALDN cloud-to-ground strokes) and WGLC (red line). Both datasets were gridded on the same 10 km equal-area grid.

### 2.3 Comparison of WGLC with the ALDN

Figure ?? shows the timeseries of mean lightning stroke density over Alaska for the WGLC and ALDN. While both datasets show similar seasonal patterns with greatest lightning density in May and June, WGLC captures only about 15% of the lightning density observed by ALDN during the peak summer season. The spatial differences between WGLC and ALDN are presented in Figure S7. In general, lightning density in WGLC is lower than ALDN throughout the central part of Alaska, with the greatest differences clustered in the central Alaska lowlands between the Alaska and Brooks ranges. On the other hand, ALDN shows somewhat lower lightning density than WGLC in coastal Alaska. The spatial structure of the differences between the datasets shows clear spatial clustering, with restricted areas of high anomaly. The largest differences between the datasets are

360 ~~observed in years with the greatest amount of lightning observed by ALDN (2015-2017)~~In 2021, mean annual median stroke  
power ranged between 2.0 and 2.8 MW throughout the year, a ca. 1 MW increase over stroke power observed between 2017  
and 2020. The geographic distribution of stroke power in 2021 was similar to that observed in previous years.

~~Timeseries of median power-per-stroke over Alaska. Lightning stroke power where strokes were present in both ALDN and~~  
~~WGLC datasets compared to those that were only present in the ALDN data. Lightning strokes present in both datasets tend~~  
365 ~~to have greater power. Lightning strokes “missing” from the WGLC tend to be the weaker lightning strokes. In Figure ?? we~~  
~~show the timeseries of lightning stroke power detected by ALDN and WGLC. In contrast with lightning density, WGLC detects~~  
~~substantially more total radiated energy than the ALDN during most years, with the exception of 2014 and 2019. To evaluate~~  
~~whether the WGLC detects the majority of the powerful lightning strokes, despite the fact that it detects fewer strokes than~~  
~~ALDN, we compared the sum of the power of lightning strokes present in both datasets versus those that were only present~~  
370 ~~in ALDN. We considered strokes to be overlapping if they were detected in the same 10 km gridecell in the same hour in both~~  
~~datasets. Figure 13 shows that the strokes detected in both datasets have significantly greater power (min 0.00040, median~~  
~~3.02180, max 494.81290) than those that are missing from WGLC (min 0.00024, median 0.80569, max 189.90781), which~~  
~~implies that the lightning that WGLC is not detecting is predominantly comprised of low-energy strokes.~~

### 3 Discussion and Conclusions

375 2021 saw substantial reductions in lightning over the Straits of Malacca and the South China Sea. These major sea lanes in  
Southeast Asia have been recognized as lightning hotspots because aerosol emissions from shipping enhance convection and  
therefore lightning (Thornton et al., 2017). Despite the ongoing COVID-19 pandemic, there is no indication that maritime trade  
decreased in 2021 relative to previous years (UNCTAD, 2021). On the other hand, the International Maritime Organization’s  
Global Sulfur Cap (IMO 2020) came into force in 2020, limiting marine bunker fuel to a sulfur content of 0.5%. Several recent  
380 studies suggested that these new fuel standards would lead to significant reductions in marine PM<sub>2.5</sub> emissions, particularly in  
East and Southeast Asia (Wang et al., 2021; Zhang et al., 2021; Sofiev et al., 2018). In addition to improving air quality, these  
new fuel standards may also have reduced the frequency of lightning, thereby presenting an additional benefit in terms of  
reduced hazards.

~~Timeseries of monthly mean lightning density of NLDN (black line) and WGLC (red line) over the conterminous United~~  
385 ~~States.~~

#### 3.1 comparison of the WGLC with NLDN

~~Figure ?? shows the timeseries of WGLC and NLDN data for the period common to both datasets (2010-2014). Similar to the~~  
~~comparison for Alaska, the seasonal cycle is very similar in both datasets, but NLDN contains greater lightning density during~~  
~~the peak lightning season. Peak summertime lightning density in WGLC is about 40% of the amount reported by NLDN.~~  
390 ~~In contrast, a comparison of monthly total stroke counts in NLDN vs. WGLC for 2013 shows that WGLC generally records~~  
~~greater lightning density than NLDN outside of the peak season, with 1.8-times more lightning in April and October and 3.4~~



times in January (Fig. S8). Comparison between WGLC and NLDN in map form (Fig. S9) shows that the spatial pattern of the differences between the datasets have similar clustering as those for Alaska, where it appears that particularly intense thunderstorms with high lightning density in NLDN are not clearly detected by WGLC. There does not appear to be an overall spatial bias to the difference between datasets, i.e., the area of greatest anomaly shifts from year to year. In 2010, for example, greatest differences are seen in Florida, along the southeast Atlantic coast, and in the middle Mississippi valley, while in 2013 the differences are largest in the central Great Plains. In contrast, WGLC shows greater lightning density than NLDN along the Gulf Coast and in Southern Texas; this difference is most apparent in 2012.

Difference between climatological annual mean lightning density in LIS/OTD (1995-2014) and WGLC (2010-2019).

### 3.1 comparison of the WGLC with LIS/OTD

Because the global lightning dataset that has been most widely used by earth system modelers is LIS/OTD, it is instructive to compare the patterns of lightning in that dataset with WGLC, even though the periods of record are not overlapping and the lightning phenomenon observed, i.e., strokes in WGLC vs. flashes in LIS/OTD, is different. In Figure ??, we show the differences in climatological mean annual lightning density between the two datasets. It is clear that LIS/OTD captures more lightning than WGLC, particularly over land. Consistent with the comparisons for Alaska and the conterminous United States, the differences between LIS/OTD and WGLC are largest in areas with greatest overall lightning density, in the tropics and humid subtropics. The area of greatest difference between the datasets is in the eastern Congo Basin, although this is also a hotspot for lightning in WGLC (see Fig. 4). Other regions where WGLC has lower lightning than LIS/OTD are in the Western High Plateau of Cameroon, the northeastern Himalaya, On the other hand, anomalously low lightning in southern Brazil, Uruguay, and northeastern Argentina, eastern and southern Africa, and northwestern South America. In the boreal Northern Hemisphere and over the oceans, the differences between the datasets are smaller, and in the Eastern Pacific, WGLC has somewhat greater lightning density than LIS/OTD. The seasonal difference between the two datasets is shown as zonal means in Figure S10. The temporal pattern of greatest anomaly follows the seasonal location of peak lightning density, with the largest differences just north of the equator in May and June, just south of the Equator from September to December, and in the northern mid-latitudes in July and August.

## 4 Discussion

While the earliest years of the WWLLN data show a strong increase in the number of lightning strokes detected over time, by 2014, total global lightning detected by the network stabilizes around ca. 210 million strokes  $\text{yr}^{-1}$ . Using an adjustment for WWLLN's reported detection efficiency, the gridded lightning timeseries and climatology can arguably be extended back to 2010, or at least to 2012. The gridded version of the WWLLN data that we present here, i.e., the WGLC, thus covers the period 2010-2020 as a timeseries and as a climatological mean over that period. We choose to use as much of the data as possible in generating our climatology as there are places where lightning is rare, e.g., in the Arctic or over the oceans, that benefit from the extra years of observation when building the climatology, because even some positive lightning density, however small,

is more realistic than zero values. Nevertheless, even with the adjustment for detection efficiency the years 2010-2012 in the  
425 WGLC should be treated with caution, as they represent global and regional stroke counts that are lower than the mean over  
subsequent years, suggesting that the ongoing build-out of the sensor network continued to affect detection efficiency over this  
period. As more years of data are incorporated into the WGLC in the future, it may be preferable to exclude these early years  
from the climatological mean.

While the spatial pattern of lightning in the WGLC looks similar to other analyses of global lightning made with WWLLN  
430 and other sensors over the past decades, the temporal pattern of showed noteworthy variability over the second decade of the  
21<sup>st</sup> century. The WGLC record is remarkable for a period of high lightning density in the tropics and Southern Hemisphere  
from 2012-2015, and increasing lightning in the mid-latitudes of the Northern Hemisphere from 2018-2020. Furthermore,  
there is a noticeable decline in median stroke power after 2013, which reached a decadal minimum in late 2020. These changes  
in lightning occurrence may Western Australia do not appear to be obviously related to transportation or industrial activity,  
435 although there is some indication that the ongoing COVID-19 pandemic may have led to reductions in pollution and therefore  
lightning (Liu et al., 2021). India, which was also severely affected by COVID-19, had greater-than-average lightning in 2021.  
These anomalies could be related to interannual climate variability.

Murray et al. (2012) summarized several cyclical climate drivers that have been hypothesized to influence lightning occurrence,  
including ENSO, the solar cycle, and the stratospheric Quasi-Biennial Oscillation (QBO) (see Figs. S11, S12 changes in  
440 precipitation patterns or other climatic factors, and S13). Similar to their analysis that used LIS/OTD (Murray et al., 2012)  
, we do not see any evidence of a global-scale relationship between WGLC lightning density and the multivariate ENSO  
index, total solar irradiance, or the QBO. On the other hand, it appears that stroke energy may be correlated with the solar  
cycle. Total solar irradiance reached maximum in 2014-2015 and declined to a minimum in 2019, similar to, though not  
completely in phase with, the stroke power timeseries. Although there are plausible physical mechanisms in the solar flux that  
445 could influence atmospheric electricity (Okike and Umahi, 2019; Owens et al., 2015; Singh et al., 2011), a longer timeseries  
of lightning energy observations would be necessary to confirm this relationship deserve further study that is beyond the scope  
of this short communication.

The global maps that form the WGLC are currently distributed at daily and monthly temporal resolution and 0.5° and  
5 arc-minute resolution. In principle, it would also be possible to distribute the WGLC on even finer resolution grids, subject  
450 to the 3.4 km mean uncertainty in the WWLLN geolocation accuracy (Rodger et al., 2005). As has been shown previously  
(Virts et al., 2013b, 2015), it would also be possible to generate WGLC grids at higher temporal resolution, such as hourly.  
However the resulting data files would become very large, and with daily to monthly resolution the current standard for most  
global gridded climate datasets (e.g., Fick and Hijmans, 2017; New et al., 2000; Wilson and Jetz, 2016; Sheffield et al., 2006; Sitch et al., 2008),  
the current version of the WGLC may be applied in a range of uses in the community in its current form.

455 A recurrent characteristic of the comparison of the WGLC with independent observations of lightning from ground-based  
and spaceborne sensors shows that WGLC detects substantially less lightning during peak seasons and episodes. It appears  
that, particularly in the early years of WWLLN, the network tended to be saturated at high lightning densities, a characteristic  
that was reported previously (Virts et al., 2013a). This saturation of the sensor network means that, in some places and times,



that the effective detection efficiency of WWLLN may be 40% or less. On the other hand, WGLC appears to be better than other sensors at detecting lightning when lightning is rare, e.g., during cold seasons or in places with low overall density. Ground-based sensor networks such as ALDN and NLDN do not detect as much lightning as WGLC in coastal areas or in areas far away from the sensors. This means that the VLF technology behind WWLLN may be appropriate for producing an overall, globally consistent picture of lightning that is not influenced by sensor proximity, but that periods of intense lightning will be underestimated by the network.

Furthermore, our analysis of the WGLC in comparison with the ALDN shows that while WGLC detects as few as 85% fewer lightning strokes during the peak season in Alaska, those strokes it does detect tend to be the more powerful ones. WGLC is therefore “missing” mainly the weaker lightning strokes. Rodger et al. (2006) showed that, through comparison with New Zealand Lightning Detection Network data, the detection efficiency of WWLLN for powerful lightning strokes (strokes  $> 50$  kA peak current) increases to about 80%. Global analysis of WWLLN data concluded that the detection efficiency of the network is 60–80% for high-amplitude strokes (Holzworth et al., 2019). Thus, while not capturing all strokes, the WGLC may still be useful in understanding when, where, and how much of the most hazardous lightning occurs, i.e., that which may be more likely to ignite wildfires or damage infrastructure, for example We suggested previously that temporal trend in lightning stroke power could be related to total solar irradiance (TSI; Kaplan and Lau, 2021a). The 2021 lightning data do show an increase in median stroke power over the past few years, concomitant with increasing TSI in Solar Cycle 25 that started in early 2020. This increase in stroke power is intriguing, but it will likely take several more years of observation of both TSI and lightning to demonstrate an unequivocal link between these quantities.

As the most widely used global gridded lightning dataset among earth system scientists, it is worth comparing the LIS/OTD timeseries and climatology (Christian, 2003) with WGLC. Because LIS/OTD is based on optical sensors on satellites in low earth orbit to detect lightning flashes, compared with WGLC’s network of ground-based VLF receivers, we expect the dataset to be different from WGLC. Our analysis shows that WGLC captures on average 10% lightning strokes recorded by LIS/OTD on land, with notable differences in the Congo Basin and northwestern Himalaya (Albrecht et al., 2016). Over the oceans the comparison is more favorable with WGLC capturing an average of 33% of the flashes in LIS/OTD. In some oceanic areas, WGLC has a greater annual mean lightning density than LIS/OTD (Fig. ??).

In an earlier comparison between LIS/OTD and WWLLN, Rudlosky and Shea (2013) showed that lightning flashes detected by LIS/OTD could be composed of multiple lightning strokes. They found that, on average, WWLLN captured 1.5 strokes for each LIS/OTD flash, although 71.5% of the WWLLN-matched LIS/OTD flashes were from a single lightning stroke. Because WGLC nearly always has lower lightning density than LIS/OTD, and because a single LIS/OTD flash may be comprised of multiple lightning strokes, the detection efficiency of WWLLN may be even lower than might be assumed based on a simple comparison of the two datasets. Our simple comparison shows that WGLC is about three times more likely to detect LIS/OTD flashes over ocean (33%) than over land (10%). Accounting for the mean multiple-stroke-per-flash discrepancy of 1.5 implies that WGLC’s implied detection efficiency using LIS/OTD as a standard would be 22% over ocean and 6.6% on land, which is in line with the 17.3% over ocean and 6.4% over land reported previously (Rudlosky and Shea, 2013).

Based on our comparisons of WGLC with ALDN and NLDN, we ascribe the differences in lightning density between WGLC and LIS/OTD to 1) the known behavior for WWLLN to saturate at high lightning densities (Virts et al., 2013a), 2) 495 that LIS/OTD captures more weak cloud-to-cloud lightning activity (Christian, 2003), particularly near cloud tops, that would not necessarily be detected by WWLLN, as shown in our analysis for Alaska, and 3) that LIS/OTD is subject to a number of postprocessing steps and adjustments for detection efficiency that add uncertainty to the final data product.

Nevertheless, from all of the comparisons between WGLC and other datasets it is clear that WGLC has less lightning than independent observations. However, this does not mean that the WGLC is not useful. Other datasets either cover only a limited 500 period, have limited spatial coverage or resolution, are not free, or all of the above. WGLC in contrast, is based on a single methodology from a global sensor network (WWLLN) that has continuously observed lightning since 2005. The WGLC will be updated annually, which makes it valuable for understanding changes in lightning over time and how climate change is affecting lightning frequency and distribution. Furthermore, WGLC is the only free source that can provide data on lightning at any nearly any spatial and temporal resolution, limited only by the properties of the sensor network, i.e., milliseconds in 505 time and ca. 3.4 km in space. Finally, WGLC provides stroke energy estimates as well as lightning location. The WGLC may therefore be a valuable tool for a range of research applications.

Among the applications for which the WGLC may be suitable, a few that stand out include modeling global wildfire and atmospheric chemistry, and risk and hazard assessment, particularly in regions of the world where no other lightning detection networks exist. Because the WGLC is a homogeneous global dataset it is possible to directly compare lightning 510 observations between locations without the inter-network calibration that would be required to analyze data from different regional networks perhaps using different technologies. WGLC will be particularly useful for understanding the patterns of natural, i.e., non-human caused, wildfire ignitions in remote locations such as boreal and tropical forests and in areas of the developing world currently undergoing rapid land use change. WGLC may also be useful in parameterizing atmospheric chemistry models to estimate lightning  $\text{NO}_x$  production (e.g., Allen et al., 2019; Buesela et al., 2019; Murray et al., 2012), and 515 to better understand the relationship between extraterrestrial radiation and atmospheric electricity (e.g., Okike and Umahi, 2019; Owens et al., 2019).

WGLC may be a useful tool for assessing lightning hazards to persons and property (e.g., Holle, 2014; Zhang et al., 2010). While the WGLC geolocation accuracy is probably too low to identify individual buildings or other types of infrastructure, WGLC may be used in a probabilistic way to understand seasonal, diurnal, and climatological lightning patterns. This capability 520 of the WGLC will be particularly useful in regions of the world that are not currently served by high-sensitivity regional lightning detection networks, including much of the developing world and oceanic areas. For example, WGLC's generally high detection efficiency. This 2022 update of the dataset demonstrates several features that underscore the utility of the WGLC. The WWLLN network, at least after applying a detection efficiency correction, shows no long term trend in the number of lightning strokes recorded since 2012, and we now have ten years of quality lightning observations with which to construct 525 global climatologies. The WGLC shows that lightning is detected worldwide, even in places with very low density including the Arctic and over the oceans may make it particularly useful for assessing lightning risks to shipping in open ocean regions.

Finally, as a completely free, open-access dataset, the WGLC can serve researchers, governments, NGOs, and communities that do not have resources to purchase commercial lightning data.

530 Since its inception in 2005, the WWLLN has grown to the point where the network is capable of producing a globally consistent, spatially-resolved picture of lightning activity over land and the oceans. These raw data, gridded, adjusted for detection efficiency, and continuously updated over time, form the WGLC (Kaplan and Lau, 2021b). With more than a decade of reliable data on stroke density and power in the dataset, we can now start to investigate changes in the spatio-temporal pattern of lightning. Lightning strokes appear to show important variability on interannual timescales, and while these patterns may be attributable to interannual climate variability, they require further study to clearly identify the drivers. These data are useful for a  
535 range of purposes, including studies on air quality, chemical composition of the atmosphere, and wildfire ignitions. The WGLC is distributed for free online in two standard spatial resolutions (0.5° and 5 arc-minute) and with monthly temporal resolution. Other versions of the WGLC could be prepared in response to community demand. While the WGLC does not capture every lightning stroke, and appears to underestimate stroke density at peak periods, it represents a unique, open-access global gridded lightning climatology and timeseries that may be a valuable tool for researchers in a range of fields including wildfire ignitions,  
540 atmospheric chemistry, and assessment of lightning risks to humans, animals, and infrastructure free to download and will  
continue to be updated annually in the future.

#### 4 Code availability

The code used for gridding the raw stroke counts, and progressive updates to the gridded data, are archived at <https://github.com/ARVE-Research/WGLC>.

#### 545 5 Data availability

The WGLC gridded lightning density and power fields are distributed as a timeseries at daily and monthly resolution and as a climatological monthly mean. The data are stored in netCDF format and are archived with Zenodo (Kaplan and Lau, 2022, <https://doi.org/10.5281/zenodo.6007052>).

*Author contributions.* JOK conceived the datasets and developed the gridding process, and oversaw the evaluation. KHK performed the  
550 data preprocessing and gridding, and prepared the visualizations. Both authors contributed to writing the manuscript.

*Competing interests.* The authors declare that they have no competing interests.

*Acknowledgements.* ~~We thank Bob Holzworth for helping us understand the properties and limitations of the WWLLN, and Abe Jacobson, James Brundell, and Michael McCarthy for their comments on a draft of the manuscript. An initial purchase of WWLLN raw data used to develop the WGLC was supported by the U. S. National Science Foundation (grant 1461590; C. Whitlock, PI). The authors wish to thank~~  
555 ~~the World Wide Lightning Location Network (<http://wwlln.net>), a collaboration among over 50 universities and institutions, for maintaining the sensor network and providing the lightning location data used in this dataset. We thank Bob Holzworth for advice and supplying us with the raw data.~~

## References

- Abarca, S. F., Corbosiero, K. L., and Galarneau, T. J.: An evaluation of the Worldwide Lightning Location Network (WWLLN) using the National Lightning Detection Network (NLDN) as ground truth, *Journal of Geophysical Research*, 115, <https://doi.org/10.1029/2009jd013411>, 2010.
- Alaska Interagency Coordination Center: Historical Lightning as txt, [https://fire.ak.blm.gov/content/maps/aicc/Data/Data%20\(zippped%20Text%20Files\)/Historical\\_Lightning\\_as\\_txt.zip](https://fire.ak.blm.gov/content/maps/aicc/Data/Data%20(zippped%20Text%20Files)/Historical_Lightning_as_txt.zip), 2021.
- Albrecht, R. I., Goodman, S. J., Buechler, D. E., Blakeslee, R. J., and Christian, H. J.: Where Are the Lightning Hotspots on Earth?, *Bulletin of the American Meteorological Society*, 97, 2051–2068, <https://doi.org/10.1175/bams-d-14-00193.1>, 2016.
- Allen, D. J., Pickering, K. E., Bucsela, E., Krotkov, N., and Holzworth, R.: Lightning NO<sub>x</sub> Production in the Tropics as Determined Using OMI NO<sub>2</sub> Retrievals and WWLLN Stroke Data, *Journal of Geophysical Research: Atmospheres*, 124, 13 498–13 518, <https://doi.org/10.1029/2018jd029824>, 2019.
- Ammar, A. and Ghalila, H.: Estimation of nighttime ionospheric D-region parameters using tweek atmospherics observed for the first time in the North African region, *Advances in Space Research*, 66, 2528–2536, <https://doi.org/10.1016/j.asr.2020.08.025>, 2020.
- Ashley, W. S. and Gilson, C. W.: A Reassessment of U.S. Lightning Mortality, *Bulletin of the American Meteorological Society*, 90, 1501–1518, <https://doi.org/10.1175/2009bams2765.1>, 2009.
- Bieniek, P. A., Bhatt, U. S., York, A., Walsh, J. E., Lader, R., Strader, H., Ziel, R., Jandt, R. R., and Thoman, R. L.: Lightning Variability in Dynamically Downscaled Simulations of Alaska’s Present and Future Summer Climate, *Journal of Applied Meteorology and Climatology*, 59, 1139–1152, <https://doi.org/10.1175/Jamc-D-19-0209.1>, 2020.
- Bovalo, C., Barthe, C., and Bègue, N.: A lightning climatology of the South-West Indian Ocean, *Natural Hazards and Earth System Sciences*, 12, 2659–2670, <https://doi.org/10.5194/nhess-12-2659-2012>, 2012.
- Brooks, C. E. P.: The distribution of thunderstorms over the globe, *Geophysical Memoirs*, 3, 147–164, 1925.
- Bucsela, E. J., Pickering, K. E., Allen, D. J., Holzworth, R. H., and Krotkov, N. A.: Midlatitude Lightning NO<sub>x</sub> Production Efficiency Inferred From OMI and WWLLN Data, *Journal of Geophysical Research: Atmospheres*, 124, 13 475–13 497, <https://doi.org/10.1029/2019jd030561>, 2019.
- Bürgesser, R. E.: Assessment of the World Wide Lightning Location Network (WWLLN) detection efficiency by comparison to the Lightning Imaging Sensor (LIS), *Quarterly Journal of the Royal Meteorological Society*, 143, 2809–2817, <https://doi.org/10.1002/qj.3129>, 2017.
- Bürgesser, R. E., Nicora, M. G., and Ávila, E. E.: Characterization of the lightning activity of “Relámpago del Catatambo”, *Journal of Atmospheric and Solar-Terrestrial Physics*, 77, 241–247, <https://doi.org/10.1016/j.jastp.2012.01.013>, 2012.
- Cecil, D. J., Buechler, D. E., and Blakeslee, R. J.: Gridded lightning climatology from TRMM-LIS and OTD: Dataset description, *Atmospheric Research*, 135, 404–414, <https://doi.org/10.1016/j.atmosres.2012.06.028>, 2014.
- Christian, H. J.: Global frequency and distribution of lightning as observed from space by the Optical Transient Detector, *Journal of Geophysical Research*, 108, <https://doi.org/10.1029/2002jd002347>, 2003.
- Community Modeling and Analysis System: CMAQv5.0 - CMAQv5.1 Monthly NLDN Flash Counts, <https://www.cmascenter.org/download/data/nldn.cfm>, 2021.
- Cope, M. J. and Chaloner, W. G.: Fossil charcoal as evidence of past atmospheric composition, *Nature*, 283, 647–649, <https://doi.org/10.1038/283647a0>, 1980.

- Cummins, K. L., Cramer, J. A., Biagi, C. J., Krider, E. P., Jerauld, J., Uman, M. A., and Rakov, V. A.: The U.S. National Lightning Detection Network: Post-Upgrade Status, in: Second Conference on Meteorological Applications of Lightning Data, 2006.
- Daubenmire, R.: Ecology of Fire in Grasslands, vol. 5, pp. 209–266, Academic Press, [https://doi.org/10.1016/S0065-2504\(08\)60226-3](https://doi.org/10.1016/S0065-2504(08)60226-3), 1968.
- Dowden, R. L., Brundell, J. B., and Rodger, C. J.: VLF lightning location by time of group arrival (TOGA) at multiple sites, *Journal of Atmospheric and Solar-Terrestrial Physics*, 64, 817–830, [https://doi.org/10.1016/s1364-6826\(02\)00085-8](https://doi.org/10.1016/s1364-6826(02)00085-8), 2002.
- Dwyer, J. R. and Uman, M. A.: The physics of lightning, *Physics Reports*, 534, 147–241, <https://doi.org/10.1016/j.physrep.2013.09.004>, 2014.
- Farukh, M. A., Hayasaka, H., and Kimura, K.: Characterization of Lightning Occurrence in Alaska Using Various Weather Indices for Lightning Forecasting, *Journal of Disaster Research*, 6, 343–355, <https://doi.org/10.20965/jdr.2011.p0343>, 2011.
- Fick, S. E. and Hijmans, R. J.: WorldClim 2: new 1-km spatial resolution climate surfaces for global land areas, *International Journal of Climatology*, 37, 4302–4315, <https://doi.org/10.1002/joc.5086>, 2017.
- Finney, D. L., Doherty, R. M., Wild, O., Young, P. J., and Butler, A.: Response of lightning NO<sub>x</sub> emissions and ozone production to climate change: Insights from the Atmospheric Chemistry and Climate Model Intercomparison Project, *Geophysical Research Letters*, 43, 5492–5500, <https://doi.org/10.1002/2016gl068825>, 2016.
- Fronterhouse, B. A.: Alaska Lightning Detection Network (ALDN) briefing document, Report, Bureau of Land Management, Alaska Fire Service, 2012.
- Fuschino, F., Marisaldi, M., Labanti, C., Barbiellini, G., Del Monte, E., Bulgarelli, A., Trifoglio, M., Gianotti, F., Galli, M., Argan, A., Trois, A., Tavani, M., Moretti, E., Giuliani, A., Longo, F., Costa, E., Caraveo, P., Cattaneo, P. W., Chen, A., D’Ammando, F., De Paris, G., Di Cocco, G., Di Persio, G., Donnarumma, I., Evangelista, Y., Feroci, M., Ferrari, A., Fiorini, M., Lapshov, I., Lazzarotto, F., Lipari, P., Mereghetti, S., Morselli, A., Pacciani, L., Pellizzoni, A., Perotti, F., Picozza, P., Piano, G., Pilia, M., Prest, M., Pucella, G., Rapisarda, M., Rappoldi, A., Rubini, A., Sabatini, S., Soffitta, P., Striani, E., Vallazza, E., Vercellone, S., Vittorini, V., Zambra, A., Zanello, D., Antonelli, L. A., Colafrancesco, S., Cutini, S., Giommi, P., Lucarelli, F., Pittori, C., Santolamazza, P., Verrecchia, F., and Salotti, L.: High spatial resolution correlation of AGILE TGFs and global lightning activity above the equatorial belt, *Geophysical Research Letters*, 38, n/a–n/a, <https://doi.org/10.1029/2011gl047817>, 2011.
- Hantson, S., Arneth, A., Harrison, S. P., Kelley, D. I., Prentice, I. C., Rabin, S. S., Archibald, S., Mouillot, F., Arnold, S. R., Artaxo, P., Bachelet, D., Ciais, P., Forrest, M., Friedlingstein, P., Hickler, T., Kaplan, J. O., Kloster, S., Knorr, W., Lasslop, G., Li, F., Mangeon, S., Melton, J. R., Meyn, A., Sitch, S., Spessa, A., van der Werf, G. R., Voulgarakis, A., and Yue, C.: The status and challenge of global fire modelling, *Biogeosciences*, 13, 3359–3375, <https://doi.org/10.5194/bg-13-3359-2016>, 2016.
- Holle, R. L.: Some aspects of global lightning impacts, in: 2014 International Conference on Lightning Protection (ICLP), pp. 1390–1395, <https://doi.org/10.1109/ICLP.2014.6973348>, 2014.
- Holle, R. L., Cummins, K. L., and Brooks, W. A.: Seasonal, Monthly, and Weekly Distributions of NLDN and GLD360 Cloud-to-Ground Lightning, *Monthly Weather Review*, 144, 2855–2870, <https://doi.org/10.1175/mwr-d-16-0051.1>, 2016.
- Holle, R. L., Said, R. K., and Brooks, W. A.: Monthly GLD360 Lightning Percentages by Continent, in: 25th International Lightning Detection Conference & 7th International Lightning Meteorology Conference, pp. 1–4, 2018.
- Holzworth, R. H., McCarthy, M. P., Brundell, J. B., Jacobson, A. R., and Rodger, C. J.: Global Distribution of Superbolts, *Journal of Geophysical Research: Atmospheres*, 124, 9996–10 005, <https://doi.org/10.1029/2019jd030975>, 2019.

- 630 Houze, R. A., J., Rasmussen, K. L., Zuluaga, M. D., and Brodzik, S. R.: The variable nature of convection in the tropics and subtropics: A legacy of 16 years of the Tropical Rainfall Measuring Mission satellite, *Rev Geophys*, 53, 994–1021, <https://doi.org/10.1002/2015RG000488>, 2015.
- Hutchins, M. L., Holzworth, R. H., Brundell, J. B., and Rodger, C. J.: Relative detection efficiency of the World Wide Lightning Location Network, *Radio Science*, 47, n/a–n/a, <https://doi.org/10.1029/2012rs005049>, 2012a.
- 635 Hutchins, M. L., Holzworth, R. H., Rodger, C. J., and Brundell, J. B.: Far-Field Power of Lightning Strokes as Measured by the World Wide Lightning Location Network, *Journal of Atmospheric and Oceanic Technology*, 29, 1102–1110, <https://doi.org/10.1175/Jtech-D-11-00174.1>, 2012b.
- Iwasaki, H.: Climatology of global lightning classified by stroke energy using WWLLN data, *International Journal of Climatology*, 35, 4337–4347, <https://doi.org/10.1002/joc.4291>, 2015.
- 640 Kaplan, J. O. and Lau, K. H.-K.: The WGLC global gridded lightning climatology and time series, *Earth System Science Data*, 13, 3219–3237, <https://doi.org/10.5194/essd-13-3219-2021>, 2021a.
- Kaplan, J. O. and Lau, K. H.-K.: The WWLLN Global Lightning Climatology and timeseries (WGLC), <https://doi.org/10.5281/zenodo.4774529>, 2021b.
- Kaplan, J. O. and Lau, K. H.-K.: The WWLLN Global Lightning Climatology and timeseries (WGLC), v2022.0.0, <https://doi.org/10.5281/zenodo.6007052>, 2022.
- 645 Karger, D. N., Conrad, O., Bohner, J., Kawohl, T., Kreft, H., Soria-Auza, R. W., Zimmermann, N. E., Linder, H. P., and Kessler, M.: Climatologies at high resolution for the earth’s land surface areas, *Sci Data*, 4, 170 122, <https://doi.org/10.1038/sdata.2017.122>, 2017.
- Komarek, Jr., E. V.: The Natural History of Lightning, in: 3rd Tall Timbers Fire Ecology Conference 1964, vol. 3, pp. 139–184, Tall Timbers Research Station & Land Conservancy, 1964.
- 650 Koshak, W. J., Cummins, K. L., Buechler, D. E., Vant-Hull, B., Blakeslee, R. J., Williams, E. R., and Peterson, H. S.: Variability of CONUS Lightning in 2003–12 and Associated Impacts, *Journal of Applied Meteorology and Climatology*, 54, 15–41, <https://doi.org/10.1175/jamc-d-14-0072.1>, 2015.
- Krawchuk, M. A., Moritz, M. A., Parisien, M. A., Van Dorn, J., and Hayhoe, K.: Global pyrogeography: the current and future distribution of wildfire, *PLoS One*, 4, e5102, <https://doi.org/10.1371/journal.pone.0005102>, 2009.
- 655 Krider, E. P.: Benjamin Franklin and lightning rods, *Physics Today*, 59, 42–48, <https://doi.org/10.1063/1.2180176>, 2006.
- Lin, S.-J. and Chou, K.-H.: The Lightning Distribution of Tropical Cyclones over the Western North Pacific, *Monthly Weather Review*, 148, 4415–4434, <https://doi.org/10.1175/mwr-d-19-0327.1>, 2020.
- Liu, Y., Williams, E. R., Guha, A., and Said, R.: How will lightning change during the pollution-reduced COVID-19 pandemic period? A data study on the global lightning activity, in: AGU Fall Meeting, 2021.
- 660 Murray, L. T., Jacob, D. J., Logan, J. A., Hudman, R. C., and Koshak, W. J.: Optimized regional and interannual variability of lightning in a global chemical transport model constrained by LIS/OTD satellite data, *Journal of Geophysical Research: Atmospheres*, 117, <https://doi.org/10.1029/2012jd017934>, 2012.
- New, M., Hulme, M., and Jones, P.: Representing twentieth-century space-time climate variability. Part II: Development of 1901-96 monthly grids of terrestrial surface climate, *Journal of Climate*, 13, 2217–2238, [https://doi.org/10.1175/1520-0442\(2000\)013<2217:Rtctsc>2.0.Co;2](https://doi.org/10.1175/1520-0442(2000)013<2217:Rtctsc>2.0.Co;2), 2000.
- 665 Okike, O. and Umahi, A. E.: Cosmic ray - global lightning causality, *Journal of Atmospheric and Solar-Terrestrial Physics*, 189, 35–43, <https://doi.org/10.1016/j.jastp.2019.04.002>, 2019.

- Orville, R. E.: Lightning Ground Flash Density in the Contiguous United States-1989, *Monthly Weather Review*, 119, 573–577, [https://doi.org/10.1175/1520-0493\(1991\)119<0573:Lgfdit>2.0.Co;2](https://doi.org/10.1175/1520-0493(1991)119<0573:Lgfdit>2.0.Co;2), 1991.
- 670 Orville, R. E.: Cloud-to-Ground Lightning Flash Characteristics in the Contiguous United-States - 1989-1991, *Journal of Geophysical Research-Atmospheres*, 99, 10 833–10 841, <https://doi.org/10.1029/93jd02914>, 1994.
- Orville, R. E. and Spencer, D. W.: Global Lightning Flash Frequency, *Monthly Weather Review*, 107, 934–943, [https://doi.org/10.1175/1520-0493\(1979\)107<0934:Glff>2.0.Co;2](https://doi.org/10.1175/1520-0493(1979)107<0934:Glff>2.0.Co;2), 1979.
- Orville, R. E., Huffines, G. R., Burrows, W. R., and Cummins, K. L.: The North American Lightning Detection Network (NALDN)—Analysis  
675 of Flash Data: 2001–09, *Monthly Weather Review*, 139, 1305–1322, <https://doi.org/10.1175/2010mwr3452.1>, 2011.
- Owens, M. J., Scott, C. J., Bennett, A. J., Thomas, S. R., Lockwood, M., Harrison, R. G., and Lam, M. M.: Lightning as a space-weather hazard: UK thunderstorm activity modulated by the passage of the heliospheric current sheet, *Geophysical Research Letters*, 42, 9624–9632, <https://doi.org/10.1002/2015gl066802>, 2015.
- Perry, L. B., Seimon, A., and Kelly, G. M.: Precipitation delivery in the tropical high Andes of southern Peru: new findings and paleoclimatic  
680 implications, *International Journal of Climatology*, 34, 197–215, <https://doi.org/10.1002/joc.3679>, 2014.
- Pfeiffer, M., Spessa, A., and Kaplan, J. O.: A model for global biomass burning in preindustrial time: LPJ-LMfire (v1.0), *Geoscientific Model Development*, 6, 643–685, <https://doi.org/10.5194/gmd-6-643-2013>, 2013.
- Poveda, G. and Mesa, O. J.: On the existence of Lloró (the rainiest locality on Earth): Enhanced ocean-land-atmosphere interaction by a low-level jet, *Geophysical Research Letters*, 27, 1675–1678, <https://doi.org/10.1029/1999gl006091>, 2000.
- 685 Rodger, C. J., Brundell, J. B., Dowden, R. L., and Thomson, N. R.: Location accuracy of long distance VLF lightning location network, *Annales Geophysicae*, 22, 747–758, <https://doi.org/10.5194/angeo-22-747-2004>, 2004.
- Rodger, C. J., Brundell, J. B., and Dowden, R. L.: Location accuracy of VLF World-Wide Lightning Location (WWLL) network: Post-algorithm upgrade, *Annales Geophysicae*, 23, 277–290, <https://doi.org/10.5194/angeo-23-277-2005>, 2005.
- Rodger, C. J., Werner, S., Brundell, J. B., Lay, E. H., Thomson, N. R., Holzworth, R. H., and Dowden, R. L.: Detection efficiency of the VLF World-Wide Lightning Location Network (WWLLN): initial case study, *Annales Geophysicae*, 24, 3197–3214, <https://doi.org/10.5194/angeo-24-3197-2006>, 2006.
- 690 Rudlosky, S. D. and Shea, D. T.: Evaluating WWLLN performance relative to TRMM/LIS, *Geophysical research letters*, 40, 2344–2348, <https://doi.org/10.1002/grl.50428>, 2013.
- Schumann, U. and Huntrieser, H.: The global lightning-induced nitrogen oxides source, *Atmospheric Chemistry and Physics*, 7, 3823–3907, <https://doi.org/10.5194/acp-7-3823-2007>, 2007.
- 695 Sheffield, J., Goteti, G., and Wood, E. F.: Development of a 50-year high-resolution global dataset of meteorological forcings for land surface modeling, *Journal of Climate*, 19, 3088–3111, <https://doi.org/10.1175/Jcli3790.1>, 2006.
- Sheridan, S. C., Griffiths, J. F., and Orville, R. E.: Warm season cloud-to-ground lightning-precipitation relationships in the south-central United States, *Weather and Forecasting*, 12, 449–458, [https://doi.org/10.1175/1520-0434\(1997\)012<0449:Wsctgl>2.0.Co;2](https://doi.org/10.1175/1520-0434(1997)012<0449:Wsctgl>2.0.Co;2), 1997.
- 700 Siingh, D., Singh, R. P., Singh, A. K., Kulkarni, M. N., Gautam, A. S., and Singh, A. K.: Solar Activity, Lightning and Climate, *Surveys in Geophysics*, 32, 659–703, <https://doi.org/10.1007/s10712-011-9127-1>, 2011.
- Sitch, S., Friedlingstein, P., Gruber, N., Jones, S. D., Murray-Tortarolo, G., Ahlström, A., Doney, S. C., Graven, H., Heinze, C., Huntingford, C., Levis, S., Levy, P. E., Lomas, M., Poulter, B., Viovy, N., Zaehle, S., Zeng, N., Arneeth, A., Bonan, G., Bopp, L., Canadell, J. G., Chevallier, F., Ciais, P., Ellis, R., Gloor, M., Peylin, P., Piao, S. L., Le Quééré, C., Smith, B., Zhu, Z., and Myneni, R.: Recent trends and  
705 drivers of regional sources and sinks of carbon dioxide, *Biogeosciences*, 12, 653–679, <https://doi.org/10.5194/bg-12-653-2015>, 2015.



- Smith, D. M., Lopez, L. I., Lin, R. P., and Barrington-Leigh, C. P.: Terrestrial gamma-ray flashes observed up to 20 MeV, *Science*, 307, 1085–8, <https://doi.org/10.1126/science.1107466>, 2005.
- Sofiev, M., Winebrake, J. J., Johansson, L., Carr, E. W., Prank, M., Soares, J., Vira, J., Kouznetsov, R., Jalkanen, J. P., and Corbett, J. J.: Cleaner fuels for ships provide public health benefits with climate tradeoffs, *Nat Commun*, 9, 406, <https://doi.org/10.1038/s41467-017-02774-9>, 2018.
- Solorzano, N. N., Thomas, J. N., Hutchins, M. L., and Holzworth, R. H.: WWLLN lightning and satellite microwave radiometrics at 37 to 183GHz: Thunderstorms in the broad tropics, *Journal of Geophysical Research-Atmospheres*, 121, 12 298–12 318, <https://doi.org/10.1002/2016jd025374>, 2016.
- Soula, S., Kasereka, J. K., Georgis, J. F., and Barthe, C.: Lightning climatology in the Congo Basin, *Atmospheric Research*, 178, 304–319, <https://doi.org/10.1016/j.atmosres.2016.04.006>, 2016.
- Thonicke, K., Spessa, A., Prentice, I. C., Harrison, S. P., Dong, L., and Carmona-Moreno, C.: The influence of vegetation, fire spread and fire behaviour on biomass burning and trace gas emissions: results from a process-based model, *Biogeosciences*, 7, 1991–2011, <https://doi.org/10.5194/bg-7-1991-2010>, 2010.
- Thornton, J. A., Virts, K. S., Holzworth, R. H., and Mitchell, T. P.: Lightning enhancement over major oceanic shipping lanes, *Geophysical Research Letters*, 44, 9102–9111, <https://doi.org/10.1002/2017gl074982>, 2017.
- UNCTAD: Review of Maritime Transport 2021, United Nations, Geneva, 2021.
- Virts, K. S., Wallace, J. M., Hutchins, M. L., and Holzworth, R. H.: Highlights of a New Ground-Based, Hourly Global Lightning Climatology, *Bulletin of the American Meteorological Society*, 94, 1381–1391, <https://doi.org/10.1175/bams-d-12-00082.1>, 2013a.
- Virts, K. S., Wallace, J. M., Hutchins, M. L., and Holzworth, R. H.: Diurnal Lightning Variability over the Maritime Continent: Impact of Low-Level Winds, Cloudiness, and the MJO, *Journal of the Atmospheric Sciences*, 70, 3128–3146, <https://doi.org/10.1175/Jas-D-13-021.1>, 2013b.
- Virts, K. S., Wallace, J. M., Hutchins, M. L., and Holzworth, R. H.: Diurnal and Seasonal Lightning Variability over the Gulf Stream and the Gulf of Mexico, *Journal of the Atmospheric Sciences*, 72, 2657–2665, <https://doi.org/10.1175/Jas-D-14-0233.1>, 2015.
- Wang, X., Yi, W., Lv, Z., Deng, F., Zheng, S., Xu, H., Zhao, J., Liu, H., and He, K.: Ship emissions around China under gradually promoted control policies from 2016 to 2019, *Atmospheric Chemistry and Physics*, 21, 13 835–13 853, <https://doi.org/10.5194/acp-21-13835-2021>, 2021.
- Williams, E. R.: Lightning and climate: A review, *Atmospheric Research*, 76, 272–287, <https://doi.org/10.1016/j.atmosres.2004.11.014>, 2005.
- Wilson, A. M. and Jetz, W.: Remotely Sensed High-Resolution Global Cloud Dynamics for Predicting Ecosystem and Biodiversity Distributions, *PLoS Biol*, 14, e1002 415, <https://doi.org/10.1371/journal.pbio.1002415>, 2016.
- Zhang, W., Meng, Q., Ma, M., and Zhang, Y.: Lightning casualties and damages in China from 1997 to 2009, *Natural Hazards*, 57, 465–476, <https://doi.org/10.1007/s11069-010-9628-0>, 2010.
- Zhang, Y., Eastham, S. D., Lau, A. K. H., Fung, J. C. H., and Selin, N. E.: Global air quality and health impacts of domestic and international shipping, *Environmental Research Letters*, 16, <https://doi.org/10.1088/1748-9326/ac146b>, 2021.
- Zipser, E. J., Cecil, D. J., Liu, C., Nesbitt, S. W., and Yorty, D. P.: Where Are the Most Intense Thunderstorms on Earth?, *Bulletin of the American Meteorological Society*, 87, 1057–1072, <https://doi.org/10.1175/bams-87-8-1057>, 2006.
